# Supplementary material
Source: PubMed Central journal article supplement (PMC2570759)

Supplementary material for the article “Meta-analysis of depression and substance use and impairment among cocaine users” published in *Drug and Alcohol Dependence*

by

<sup>a</sup>Kenneth R. Conner, <sup>b</sup>Martin Piquart, and <sup>c</sup>Amanda P. Holbrook

<sup>a</sup>University of Rochester Medical Center, Department of Psychiatry,  
300 Crittenden Boulevard, Rochester, NY 14642 and  
Center of Excellence, Veterans Administration, 400 Fort Hill Avenue,  
Canandaigua, NY 14424

<sup>b</sup>Philipps University, D-35032 Marburg, Germany

<sup>c</sup>Rochester Institute of Technology,  
One Lomb Memorial Drive, Rochester, NY 14623

This material supplements but does not replace the content of the peer-reviewed paper published in *Drug and Alcohol Dependence*

Corresponding author:

Kenneth R. Conner

University of Rochester Medical Center, Psychiatry

300 Crittenden Blvd

Rochester, NY 14642 USA

[kenneth\\_conner@urmc.rochester.edu](mailto:kenneth_conner@urmc.rochester.edu)

Meta-analysis of depression and substance use and impairment among cocaine users

Kenneth R. Conner, Martin Piquart, Amanda P. Holbrook.

This material supplements but does not replace the content of the peer-reviewed paper published in *Drug and Alcohol Dependence*. There are five funnel plots displayed here. Interpretations of the plots are provided in the text in section 3.4.

Supplemental Figure A. Funnel plot showing association of depression with concurrent cocaine use and impairment

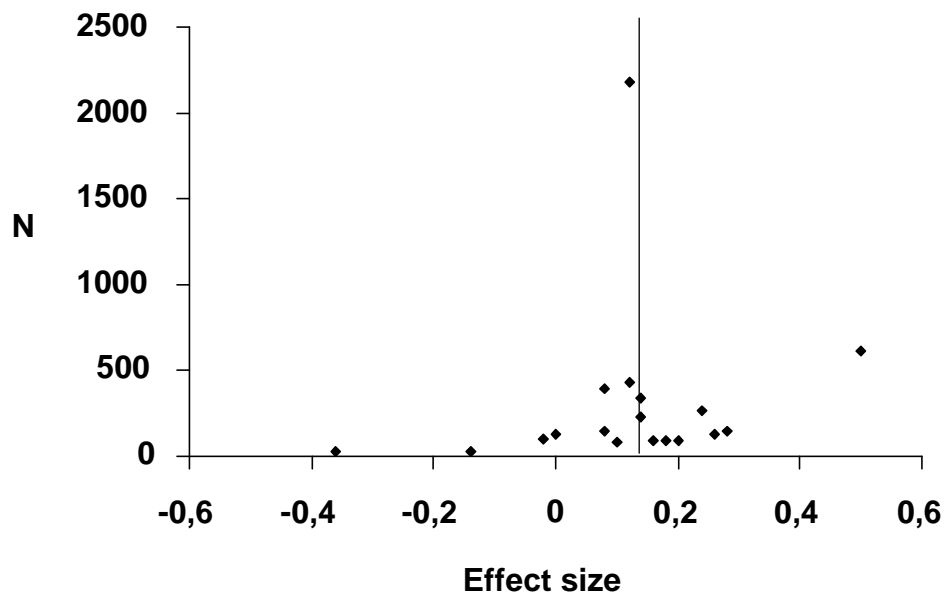

Supplemental Figure B. Funnel plot showing association of depression with prospective cocaine use and impairment

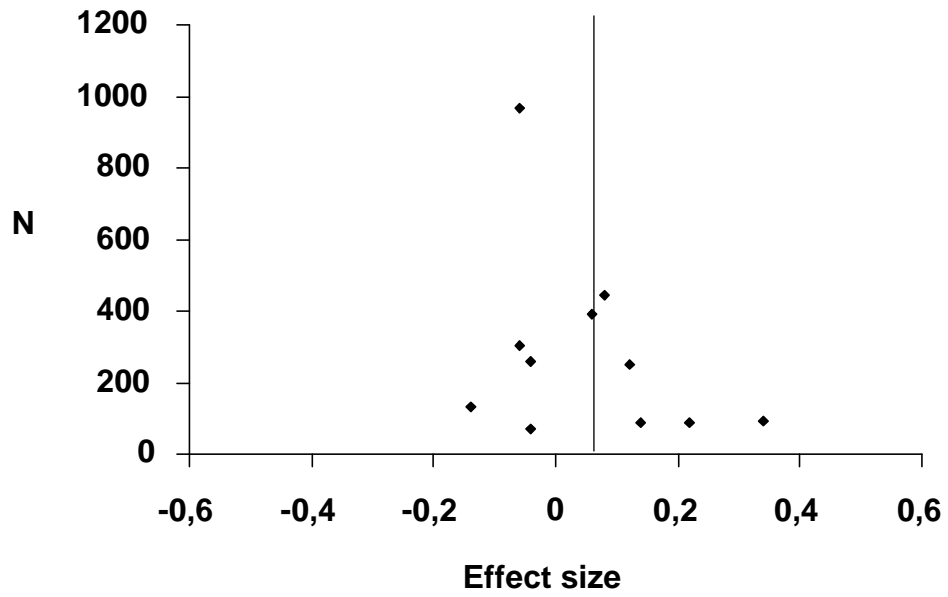

Supplemental Figure C. Funnel plot showing concurrent association of depression with alcohol use and impairment

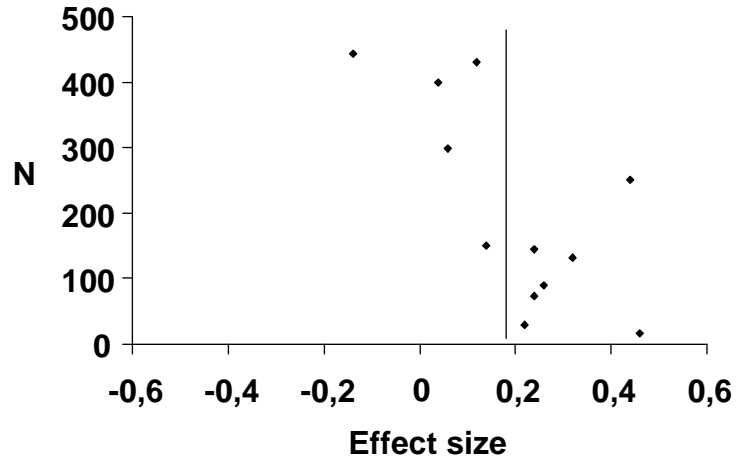

Supplemental Figure D. Funnel plot showing association of depression with general drug use and impairment

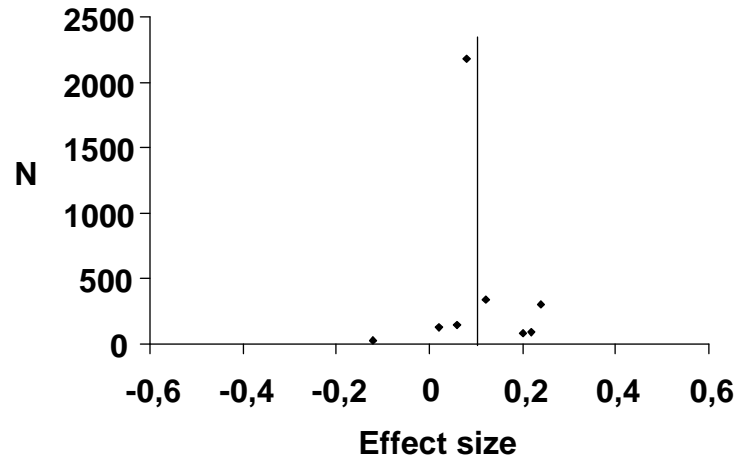

Supplemental Figure E. Funnel plot showing change in depressive symptoms

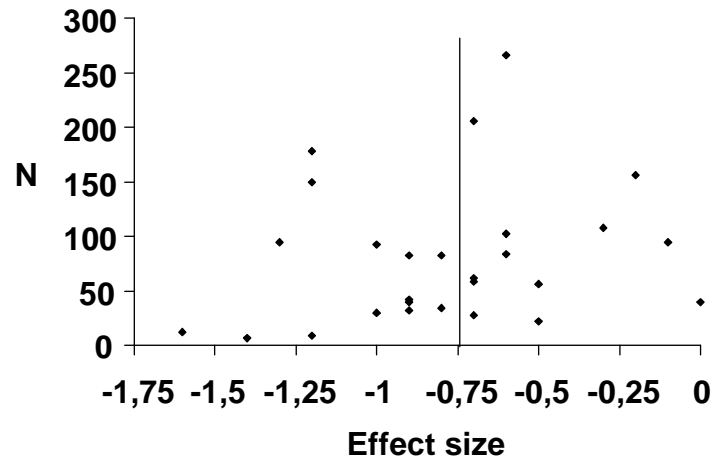

Supplement: NIHMS70637-supplement-01.pdf [file NIHMS70637-supplement-01.pdf]
